# Supplementary material
Source: MDPI journal article supplement (https://www.mdpi.com/1420-3049/26/16/4869)

# checkCIF/PLATON report

Structure factors have been supplied for datablock(s) vale66

THIS REPORT IS FOR GUIDANCE ONLY. IF USED AS PART OF A REVIEW PROCEDURE FOR PUBLICATION, IT SHOULD NOT REPLACE THE EXPERTISE OF AN EXPERIENCED CRYSTALLOGRAPHIC REFEREE.

No syntax errors found.      CIF dictionary      Interpreting this report

## Datablock: vale66

---

|                 |                          |                               |
|-----------------|--------------------------|-------------------------------|
| Bond precision: | C-C = 0.0029 Å           | Wavelength=0.71073            |
| Cell:           | a=11.4417(3)             | b=8.9507(2)      c=21.7210(6) |
|                 | alpha=90                 | beta=92.301(3)      gamma=90  |
| Temperature:    | 120 K                    |                               |
|                 | Calculated               | Reported                      |
| Volume          | 2222.68(10)              | 2222.68(10)                   |
| Space group     | P 21                     | P 21                          |
| Hall group      | P 2yb                    | P 2yb                         |
| Moiety formula  | C37 H53 N O8, 2(C3 H8 O) | C37 H53 N O8, 2(C3 H8 O)      |
| Sum formula     | C43 H69 N O10            | C43 H69 N O10                 |
| Mr              | 759.99                   | 759.99                        |
| Dx,g cm-3       | 1.136                    | 1.136                         |
| Z               | 2                        | 2                             |
| Mu (mm-1)       | 0.079                    | 0.079                         |
| F000            | 828.0                    | 828.0                         |
| F000'           | 828.41                   |                               |
| h,k,lmax        | 16,13,32                 | 16,13,31                      |
| Nref            | 15081[ 7965]             | 13370                         |
| Tmin,Tmax       | 0.991,0.992              | 0.906,1.000                   |
| Tmin'           | 0.984                    |                               |

Correction method= # Reported T Limits: Tmin=0.906 Tmax=1.000  
AbsCorr = MULTI-SCAN

Data completeness= 1.68/0.89      Theta(max)= 31.719

R(reflections)= 0.0448( 11518)      wR2(reflections)= 0.1169( 13370)

S = 1.021      Npar= 538

---

The following ALERTS were generated. Each ALERT has the format

**test-name\_ALERT\_alert-type\_alert-level.**

Click on the hyperlinks for more details of the test.

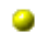

#### Alert level C

PLAT202\_ALERT\_3\_C Isotropic non-H Atoms in Anion/Solvent ..... 1 Check  
C40

**Author Response: The position of one solvent molecule was poorly defined and one atom could only be refined isotropically.**

PLAT220\_ALERT\_2\_C NonSolvent Resd 1 C Ueq(max)/Ueq(min) Range 3.4 Ratio

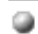

#### Alert level G

PLAT002\_ALERT\_2\_G Number of Distance or Angle Restraints on AtSite 12 Note  
PLAT007\_ALERT\_5\_G Number of Unrefined Donor-H Atoms ..... 6 Report  
PLAT172\_ALERT\_4\_G The CIF-Embedded .res File Contains DFIX Records 2 Report  
PLAT302\_ALERT\_4\_G Anion/Solvent/Minor-Residue Disorder (Resd 2 ) 100% Note  
PLAT302\_ALERT\_4\_G Anion/Solvent/Minor-Residue Disorder (Resd 3 ) 100% Note  
PLAT302\_ALERT\_4\_G Anion/Solvent/Minor-Residue Disorder (Resd 4 ) 100% Note  
PLAT302\_ALERT\_4\_G Anion/Solvent/Minor-Residue Disorder (Resd 5 ) 100% Note  
PLAT304\_ALERT\_4\_G Non-Integer Number of Atoms in ..... (Resd 2 ) 7.79 Check  
PLAT304\_ALERT\_4\_G Non-Integer Number of Atoms in ..... (Resd 3 ) 7.79 Check  
PLAT304\_ALERT\_4\_G Non-Integer Number of Atoms in ..... (Resd 4 ) 4.21 Check  
PLAT304\_ALERT\_4\_G Non-Integer Number of Atoms in ..... (Resd 5 ) 4.21 Check  
PLAT395\_ALERT\_2\_G Deviating X-O-Y Angle From 120 for O8 108.4 Degree  
PLAT398\_ALERT\_2\_G Deviating C-O-C Angle From 120 for O3 106.0 Degree  
PLAT417\_ALERT\_2\_G Short Inter D-H..H-D H52 ..H10B . 1.94 Ang.  
x,y,z = 1\_555 Check  
PLAT791\_ALERT\_4\_G Model has Chirality at C2 (Sohnke SpGr) R Verify

**Author Response: The absolute structure of the molecule is known and was not deter- mined by anomalous-dispersion effects. The sample was a weak anomalous scatterer. The absolute structure parameter was calculated to be -0.2(2) which is meaningless for the determination of the absolute structure. It was thus deleted from the \*.cif file.**

PLAT791\_ALERT\_4\_G Model has Chirality at C5 (Sohnke SpGr) R Verify

**Author Response: The absolute structure of the molecule is known and was not deter- mined by anomalous-dispersion effects. The sample was a weak anomalous scatterer. The absolute structure parameter was calculated to be -0.2(2) which is meaningless for the determination of the absolute structure. It was thus deleted from the \*.cif file.**

PLAT791\_ALERT\_4\_G Model has Chirality at C6 (Sohnke SpGr) R Verify

**Author Response:** The absolute structure of the molecule is known and was not determined by anomalous-dispersion effects. The sample was a weak anomalous scatterer. The absolute structure parameter was calculated to be -0.2(2) which is meaningless for the determination of the absolute structure. It was thus deleted from the \*.cif file.

PLAT791\_ALERT\_4\_G Model has Chirality at C7 (Sohnke SpGr) S Verify

**Author Response:** The absolute structure of the molecule is known and was not determined by anomalous-dispersion effects. The sample was a weak anomalous scatterer. The absolute structure parameter was calculated to be -0.2(2) which is meaningless for the determination of the absolute structure. It was thus deleted from the \*.cif file.

PLAT791\_ALERT\_4\_G Model has Chirality at C12 (Sohnke SpGr) R Verify

**Author Response:** The absolute structure of the molecule is known and was not determined by anomalous-dispersion effects. The sample was a weak anomalous scatterer. The absolute structure parameter was calculated to be -0.2(2) which is meaningless for the determination of the absolute structure. It was thus deleted from the \*.cif file.

PLAT791\_ALERT\_4\_G Model has Chirality at C17 (Sohnke SpGr) R Verify

**Author Response:** The absolute structure of the molecule is known and was not determined by anomalous-dispersion effects. The sample was a weak anomalous scatterer. The absolute structure parameter was calculated to be -0.2(2) which is meaningless for the determination of the absolute structure. It was thus deleted from the \*.cif file.

PLAT791\_ALERT\_4\_G Model has Chirality at C19 (Sohnke SpGr) S Verify

**Author Response:** The absolute structure of the molecule is known and was not determined by anomalous-dispersion effects. The sample was a weak anomalous scatterer. The absolute structure parameter was calculated to be -0.2(2) which is meaningless for the determination of the absolute structure. It was thus deleted from the \*.cif file.

PLAT791\_ALERT\_4\_G Model has Chirality at C21 (Sohnke SpGr) R Verify

**Author Response:** The absolute structure of the molecule is known and was not determined by anomalous-dispersion effects. The sample was a weak anomalous scatterer. The absolute structure parameter was calculated to be -0.2(2) which is meaningless for the determination of the absolute structure. It was thus deleted from the \*.cif file.

**Author Response: The absolute structure of the molecule is known and was not determined by anomalous-dispersion effects. The sample was a weak anomalous scatterer. The absolute structure parameter was calculated to be -0.2(2) which is meaningless for the determination of the absolute structure. It was thus deleted from the \*.cif file.**

**Author Response: The absolute structure of the molecule is known and was not determined by anomalous-dispersion effects. The sample was a weak anomalous scatterer. The absolute structure parameter was calculated to be -0.2(2) which is meaningless for the determination of the absolute structure. It was thus deleted from the \*.cif file.**

|                                                                    |          |
|--------------------------------------------------------------------|----------|
| PLAT860_ALERT_3_G Number of Least-Squares Restraints .....         | 9 Note   |
| PLAT910_ALERT_3_G Missing # of FCF Reflection(s) Below Theta(Min). | 1 Note   |
| PLAT912_ALERT_4_G Missing # of FCF Reflections Above STh/L= 0.600  | 592 Note |
| PLAT941_ALERT_3_G Average HKL Measurement Multiplicity .....       | 3.6 Low  |
| PLAT978_ALERT_2_G Number C-C Bonds with Positive Residual Density. | 15 Info  |

---

|    |                      |                                                              |
|----|----------------------|--------------------------------------------------------------|
| 0  | <b>ALERT level A</b> | = Most likely a serious problem - resolve or explain         |
| 0  | <b>ALERT level B</b> | = A potentially serious problem, consider carefully          |
| 2  | <b>ALERT level C</b> | = Check. Ensure it is not caused by an omission or oversight |
| 29 | <b>ALERT level G</b> | = General information/check it is not something unexpected   |
|    |                      |                                                              |
| 0  | ALERT type 1         | CIF construction/syntax error, inconsistent or missing data  |
| 6  | ALERT type 2         | Indicator that the structure model may be wrong or deficient |
| 4  | ALERT type 3         | Indicator that the structure quality may be low              |
| 20 | ALERT type 4         | Improvement, methodology, query or suggestion                |
| 1  | ALERT type 5         | Informative message, check                                   |

---

---

It is advisable to attempt to resolve as many as possible of the alerts in all categories. Often the minor alerts point to easily fixed oversights, errors and omissions in your CIF or refinement strategy, so attention to these fine details can be worthwhile. In order to resolve some of the more serious problems it may be necessary to carry out additional measurements or structure refinements. However, the purpose of your study may justify the reported deviations and the more serious of these should normally be commented upon in the discussion or experimental section of a paper or in the "special\_details" fields of the CIF. checkCIF was carefully designed to identify outliers and unusual parameters, but every test has its limitations and alerts that are not important in a particular case may appear. Conversely, the absence of alerts does not guarantee there are no aspects of the results needing attention. It is up to the individual to critically assess their own results and, if necessary, seek expert advice.

### **Publication of your CIF in IUCr journals**

A basic structural check has been run on your CIF. These basic checks will be run on all CIFs submitted for publication in IUCr journals (*Acta Crystallographica*, *Journal of Applied Crystallography*, *Journal of Synchrotron Radiation*); however, if you intend to submit to *Acta Crystallographica Section C* or *E* or *IUCrData*, you should make sure that full publication checks are run on the final version of your CIF prior to submission.

### **Publication of your CIF in other journals**

Please refer to the *Notes for Authors* of the relevant journal for any special instructions relating to CIF submission.

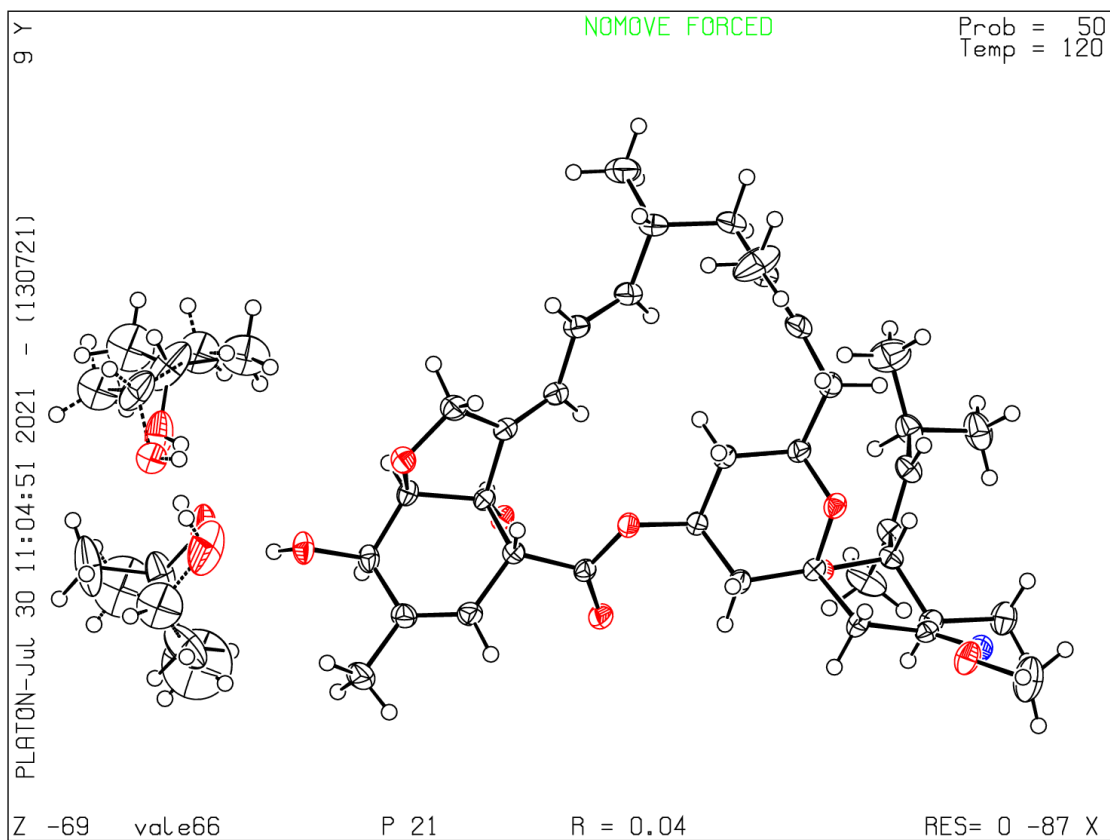

Supplement: s1 [file s1]
