# Supplementary material for: Solvatomorphism of Moxidectin
Source: MDPI journal article supplement (doi:10.3390/molecules26164869), 2021-08-11

# checkCIF/PLATON report

Structure factors have been supplied for datablock(s) vale30

THIS REPORT IS FOR GUIDANCE ONLY. IF USED AS PART OF A REVIEW PROCEDURE FOR PUBLICATION, IT SHOULD NOT REPLACE THE EXPERTISE OF AN EXPERIENCED CRYSTALLOGRAPHIC REFEREE.

No syntax errors found.      CIF dictionary      Interpreting this report

## Datablock: vale30

---

Bond precision:    C-C = 0.0049 Å                      Wavelength=0.71073

Cell:                      a=13.9453(5)              b=19.8096(6)              c=15.2680(6)  
                            alpha=90                      beta=90                      gamma=90  
Temperature:              100 K

|                        | Calculated                     | Reported                      |
|------------------------|--------------------------------|-------------------------------|
| Volume                 | 4217.8(3)                      | 4217.8(3)                     |
| Space group            | P 21 21 2                      | P 21 21 2                     |
| Hall group             | P 2 2ab                        | P 2 2ab                       |
| Moiety formula         | C37 H53 N O8, 1.233(C H3 N O2) | C37 H53 N O8, 1.23(C H3 N O2) |
| Sum formula            | C38.23 H56.70 N2.23 O10.47     | C38.23 H56.70 N2.23 O10.47    |
| Mr                     | 715.07                         | 715.05                        |
| Dx, g cm <sup>-3</sup> | 1.126                          | 1.126                         |
| Z                      | 4                              | 4                             |
| Mu (mm <sup>-1</sup> ) | 0.081                          | 0.081                         |
| F000                   | 1541.8                         | 1542.0                        |
| F000'                  | 1542.62                        |                               |
| h,k,lmax               | 17,24,19                       | 17,24,19                      |
| Nref                   | 8638[ 4794]                    | 8640                          |
| Tmin,Tmax              | 0.990,0.998                    | 0.615,1.000                   |
| Tmin'                  | 0.990                          |                               |

Correction method= # Reported T Limits: Tmin=0.615 Tmax=1.000  
AbsCorr = MULTI-SCAN

Data completeness= 1.80/1.00                      Theta(max)= 26.372

R(reflections)= 0.0536( 7995)                      wR2(reflections)= 0.1357( 8640)

S = 1.100                                      Npar= 539

---

The following ALERTS were generated. Each ALERT has the format  
**test-name\_ALERT\_alert-type\_alert-level**.  
Click on the hyperlinks for more details of the test.

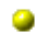

### Alert level C

DIFMX02\_ALERT\_1\_C The maximum difference density is > 0.1\*ZMAX\*0.75  
The relevant atom site should be identified.

**Author Response:** The highest residual electron density peak is located close to O1 and a split position refinement seems reasonable. However, the bond parameters obtained for the second site are not reasonable. When re-fined, the C-O bond length for the second O1 site is 1.427. This can be adjusted using SADI. However, the C2-C1-O1-O6 torsion angle for the second O1 site is 136 which is in stark contrast to the expected 180 for a carbonyl group. Using restraints to model this did not improve this situation and so we decided to not model this split. Presumably, the Q peak is caused by an artefact instead of a second atomic position.

PLAT213\_ALERT\_2\_C Atom O1 has ADP max/min Ratio ..... 3.8 prolat

**Author Response:** The atoms O1, C29 and C30 have a somewhat large ADP max/min ratio. However, they were still refined anisotropically as a split disorder could not be reasonably refined

PLAT213\_ALERT\_2\_C Atom C29 has ADP max/min Ratio ..... 3.1 prolat

**Author Response:** The atoms O1, C29 and C30 have a somewhat large ADP max/min ratio. However, they were still refined anisotropically as a split disorder could not be reasonably refined

|                              |                                      |                                 |                           |         |        |
|------------------------------|--------------------------------------|---------------------------------|---------------------------|---------|--------|
| PLAT220_ALERT_2_C NonSolvent | Resd 1                               | C                               | Ueq(max)/Ueq(min) Range   | 5.0     | Ratio  |
| PLAT220_ALERT_2_C NonSolvent | Resd 1                               | O                               | Ueq(max)/Ueq(min) Range   | 4.2     | Ratio  |
| PLAT222_ALERT_3_C NonSolvent | Resd 1                               | H                               | Uiso(max)/Uiso(min) Range | 5.7     | Ratio  |
| PLAT242_ALERT_2_C Low        | 'MainMol'                            | Ueq as Compared to Neighbors of |                           | C1      | Check  |
| PLAT242_ALERT_2_C Low        | 'MainMol'                            | Ueq as Compared to Neighbors of |                           | C28     | Check  |
| PLAT340_ALERT_3_C Low        | Bond Precision on                    | C-C Bonds .....                 |                           | 0.00489 | Ang.   |
| PLAT601_ALERT_2_C Unit Cell  | Contains Solvent Accessible VOIDS of | .                               |                           | 79      | Ang**3 |

**Author Response:** The crystal structure contains small solvent accessible voids. However, they most likely results from a loose packing in the crystal structure and do not contain any additional solvent molecules. In accordance with that, when applying the SQUEEZE routine implemented in PLATON to the current model, an insignificant electron count of only 10 electrons for the entire unit cell is obtained.

PLAT906\_ALERT\_3\_C Large K Value in the Analysis of Variance ..... 2.066 Check  
PLAT918\_ALERT\_3\_C Reflection(s) with I(obs) much Smaller I(calc) . 4 Check

---

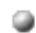

#### Alert level G

FORMU01\_ALERT\_1\_G There is a discrepancy between the atom counts in the  
\_chemical\_formula\_sum and \_chemical\_formula\_moiety. This is  
usually due to the moiety formula being in the wrong format.  
Atom count from \_chemical\_formula\_sum: C38.23 H56.7 N2.23 O10.47  
Atom count from \_chemical\_formula\_moiety: C38.23 H56.69 N2.23 O10.46  
PLAT002\_ALERT\_2\_G Number of Distance or Angle Restraints on AtSite 4 Note  
PLAT042\_ALERT\_1\_G Calc. and Reported Moiety Formula Strings Differ Please Check

**Author Response:** Caused by the disorder of the three loosely packed nitromethane sol- vent molecules about a twofold axis. The molecules could unambiguously be identified. Their disorder caused several problems with the automatic calculation of the sum and moiety formula as well the Z value.

PLAT068\_ALERT\_1\_G Reported F000 Differs from Calcd (or Missing)... Please Check  
PLAT172\_ALERT\_4\_G The CIF-Embedded .res File Contains DFIX Records 1 Report  
PLAT300\_ALERT\_4\_G Atom Site Occupancy of O9 Constrained at 0.5 Check

**Author Response:** Caused by the disorder of the three loosely packed nitromethane sol- vent molecules about a twofold axis. Unusually large ADPs in combination with large regions of negative electron density and a squeezed electron count of a model without solvent molecules (\_refine\_special\_details) suggested partial occupancy. The occupancy of one nitromethane molecule (N2,O9,O10) was refined to 99% and was thus fixed at full occupancy.

PLAT300\_ALERT\_4\_G Atom Site Occupancy of O10 Constrained at 0.5 Check

**Author Response:** Caused by the disorder of the three loosely packed nitromethane sol- vent molecules about a twofold axis. Unusually large ADPs in combination with large regions of negative electron density and a squeezed electron count of a model without solvent molecules (\_refine\_special\_details) suggested partial occupancy. The occupancy of one nitromethane molecule (N2,O9,O10) was refined to 99% and was thus fixed at full occupancy.

PLAT300\_ALERT\_4\_G Atom Site Occupancy of N2 Constrained at 0.5 Check

**Author Response:** Caused by the disorder of the three loosely packed nitromethane sol- vent molecules about a twofold axis. Unusually large ADPs in combination with large regions of negative electron density and a squeezed electron count of a model without solvent molecules (\_refine\_special\_details) suggested partial occupancy. The occupancy of one nitromethane molecule (N2,O9,O10) was refined to 99% and was thus fixed at full occupancy.

PLAT300\_ALERT\_4\_G Atom Site Occupancy of C38 Constrained at 0.5 Check

**Author Response:** Caused by the disorder of the three loosely packed nitromethane sol- vent molecules about a twofold axis. Unusually large ADPs in combina- tion with large regions of negative electron density and a squeezed electron count of a model without solvent molecules (`_refine_special_details`) suggested partial occupancy. The occupancy of one nitromethane molecule (N2,O9,O10) was refined to 99% and was thus fixed at full occupancy.

PLAT300\_ALERT\_4\_G Atom Site Occupancy of H54                      Constrained at                      0.5 Check

**Author Response:** Caused by the disorder of the three loosely packed nitromethane sol- vent molecules about a twofold axis. Unusually large ADPs in combina- tion with large regions of negative electron density and a squeezed electron count of a model without solvent molecules (`_refine_special_details`) suggested partial occupancy. The occupancy of one nitromethane molecule (N2,O9,O10) was refined to 99% and was thus fixed at full occupancy.

PLAT300\_ALERT\_4\_G Atom Site Occupancy of H55                      Constrained at                      0.5 Check

**Author Response:** Caused by the disorder of the three loosely packed nitromethane sol- vent molecules about a twofold axis. Unusually large ADPs in combina- tion with large regions of negative electron density and a squeezed electron count of a model without solvent molecules (`_refine_special_details`) suggested partial occupancy. The occupancy of one nitromethane molecule (N2,O9,O10) was refined to 99% and was thus fixed at full occupancy.

PLAT300\_ALERT\_4\_G Atom Site Occupancy of H56                      Constrained at                      0.5 Check

**Author Response:** Caused by the disorder of the three loosely packed nitromethane sol- vent molecules about a twofold axis. Unusually large ADPs in combina- tion with large regions of negative electron density and a squeezed electron count of a model without solvent molecules (`_refine_special_details`) suggested partial occupancy. The occupancy of one nitromethane molecule (N2,O9,O10) was refined to 99% and was thus fixed at full occupancy.

PLAT302\_ALERT\_4\_G Anion/Solvent/Minor-Residue Disorder (Resd 2 )                      100% Note

**Author Response:** Caused by the disorder of the three loosely packed nitromethane sol- vent molecules about a twofold axis. Unusually large ADPs in combina- tion with large regions of negative electron density and a squeezed electron count of a model without solvent molecules (`_refine_special_details`) suggested partial occupancy. The occupancy of two of the three nitromethane molecule (N3,O11,O12,N4,O13,O14) was refined to values significantly lower than 100%.

PLAT302\_ALERT\_4\_G Anion/Solvent/Minor-Residue Disorder (Resd 3 )                      100% Note

**Author Response:** Caused by the disorder of the three loosely packed nitromethane solvent molecules about a twofold axis. Unusually large ADPs in combination with large regions of negative electron density and a squeezed electron count of a model without solvent molecules (\_refine\_special\_details) suggested partial occupancy. The occupancy of two of the three nitromethane molecule (N3,O11,O12,N4,O13,O14) was refined to values significantly lower than 100%.

PLAT302\_ALERT\_4\_G Anion/Solvent/Minor-Residue Disorder (Resd 4 ) 100% Note

**Author Response:** Caused by the disorder of the three loosely packed nitromethane solvent molecules about a twofold axis. Unusually large ADPs in combination with large regions of negative electron density and a squeezed electron count of a model without solvent molecules (\_refine\_special\_details) suggested partial occupancy. The occupancy of two of the three nitromethane molecule (N3,O11,O12,N4,O13,O14) was refined to values significantly lower than 100%.

PLAT304\_ALERT\_4\_G Non-Integer Number of Atoms in ..... (Resd 2 ) 3.50 Check

**Author Response:** Caused by the disorder of the three loosely packed nitromethane solvent molecules about a twofold axis. Unusually large ADPs in combination with large regions of negative electron density suggested partial occupancy. The occupancy of two of the three nitromethane molecule (N3,O11,O12,N4,O13,O14) was refined to values significantly lower than 100%.

PLAT304\_ALERT\_4\_G Non-Integer Number of Atoms in ..... (Resd 3 ) 3.07 Check

**Author Response:** Caused by the disorder of the three loosely packed nitromethane solvent molecules about a twofold axis. Unusually large ADPs in combination with large regions of negative electron density suggested partial occupancy. The occupancy of two of the three nitromethane molecule (N3,O11,O12,N4,O13,O14) was refined to values significantly lower than 100%.

PLAT304\_ALERT\_4\_G Non-Integer Number of Atoms in ..... (Resd 4 ) 2.06 Check

**Author Response:** Caused by the disorder of the three loosely packed nitromethane solvent molecules about a twofold axis. Unusually large ADPs in combination with large regions of negative electron density suggested partial occupancy. The occupancy of two of the three nitromethane molecule (N3,O11,O12,N4,O13,O14) was refined to values significantly lower than 100%.

PLAT380\_ALERT\_4\_G Incorrectly? Oriented X(sp2)-Methyl Moiety ..... C38 Check  
 PLAT395\_ALERT\_2\_G Deviating X-O-Y Angle From 120 for O8 108.7 Degree  
 PLAT398\_ALERT\_2\_G Deviating C-O-C Angle From 120 for O3 105.5 Degree  
 PLAT789\_ALERT\_4\_G Atoms with Negative \_atom\_site\_disorder\_group # 21 Check

**Author Response:** Caused by the disorder of the three loosely packed nitromethane solvent molecules about a twofold axis of which two are only partially occupied.

PLAT791\_ALERT\_4\_G Model has Chirality at C2

(Sohnke SpGr)

R Verify

**Author Response:** The absolute structure of the molecule is known and was not determined by anomalous-dispersion effects. The sample was a weak anomalous scatterer. The absolute structure parameter was calculated to be -0.5(2) which is meaningless for the determination of the absolute structure. It was thus deleted from the \*.cif file.

PLAT791\_ALERT\_4\_G Model has Chirality at C5

(Sohnke SpGr)

R Verify

**Author Response:** The absolute structure of the molecule is known and was not determined by anomalous-dispersion effects. The sample was a weak anomalous scatterer. The absolute structure parameter was calculated to be -0.5(2) which is meaningless for the determination of the absolute structure. It was thus deleted from the \*.cif file.

PLAT791\_ALERT\_4\_G Model has Chirality at C6

(Sohnke SpGr)

R Verify

**Author Response:** The absolute structure of the molecule is known and was not determined by anomalous-dispersion effects. The sample was a weak anomalous scatterer. The absolute structure parameter was calculated to be -0.5(2) which is meaningless for the determination of the absolute structure. It was thus deleted from the \*.cif file.

PLAT791\_ALERT\_4\_G Model has Chirality at C7

(Sohnke SpGr)

S Verify

**Author Response:** The absolute structure of the molecule is known and was not determined by anomalous-dispersion effects. The sample was a weak anomalous scatterer. The absolute structure parameter was calculated to be -0.5(2) which is meaningless for the determination of the absolute structure. It was thus deleted from the \*.cif file.

PLAT791\_ALERT\_4\_G Model has Chirality at C12

(Sohnke SpGr)

R Verify

**Author Response:** The absolute structure of the molecule is known and was not determined by anomalous-dispersion effects. The sample was a weak anomalous scatterer. The absolute structure parameter was calculated to be -0.5(2) which is meaningless for the determination of the absolute structure. It was thus deleted from the \*.cif file.

PLAT791\_ALERT\_4\_G Model has Chirality at C17

(Sohnke SpGr)

R Verify

**Author Response:** The absolute structure of the molecule is known and was not determined by anomalous-dispersion effects. The sample was a weak anomalous scatterer. The absolute structure parameter was calculated to be -0.5(2) which is meaningless for the determination of the absolute structure. It was thus deleted from the \*.cif file.

**Author Response:** The absolute structure of the molecule is known and was not determined by anomalous-dispersion effects. The sample was a weak anomalous scatterer. The absolute structure parameter was calculated to be -0.5(2) which is meaningless for the determination of the absolute structure. It was thus deleted from the \*.cif file.

**Author Response:** The absolute structure of the molecule is known and was not determined by anomalous-dispersion effects. The sample was a weak anomalous scatterer. The absolute structure parameter was calculated to be -0.5(2) which is meaningless for the determination of the absolute structure. It was thus deleted from the \*.cif file.

**Author Response:** The absolute structure of the molecule is known and was not determined by anomalous-dispersion effects. The sample was a weak anomalous scatterer. The absolute structure parameter was calculated to be -0.5(2) which is meaningless for the determination of the absolute structure. It was thus deleted from the \*.cif file.

**Author Response:** The absolute structure of the molecule is known and was not determined by anomalous-dispersion effects. The sample was a weak anomalous scatterer. The absolute structure parameter was calculated to be -0.5(2) which is meaningless for the determination of the absolute structure. It was thus deleted from the \*.cif file.

|                                                                    |   |              |
|--------------------------------------------------------------------|---|--------------|
| PLAT860_ALERT_3_G Number of Least-Squares Restraints .....         | 2 | Note         |
| PLAT910_ALERT_3_G Missing # of FCF Reflection(s) Below Theta(Min). | 1 | Note         |
| PLAT965_ALERT_2_G The SHELXL WEIGHT Optimisation has not Converged |   | Please Check |
| PLAT978_ALERT_2_G Number C-C Bonds with Positive Residual Density. | 5 | Info         |

---

|      |                      |                                                              |
|------|----------------------|--------------------------------------------------------------|
| 0    | <b>ALERT level A</b> | = Most likely a serious problem - resolve or explain         |
| 0    | <b>ALERT level B</b> | = A potentially serious problem, consider carefully          |
| 12   | <b>ALERT level C</b> | = Check. Ensure it is not caused by an omission or oversight |
| 36   | <b>ALERT level G</b> | = General information/check it is not something unexpected   |
| <br> |                      |                                                              |
| 4    | <b>ALERT type 1</b>  | CIF construction/syntax error, inconsistent or missing data  |
| 12   | <b>ALERT type 2</b>  | Indicator that the structure model may be wrong or deficient |
| 6    | <b>ALERT type 3</b>  | Indicator that the structure quality may be low              |
| 26   | <b>ALERT type 4</b>  | Improvement, methodology, query or suggestion                |
| 0    | <b>ALERT type 5</b>  | Informative message, check                                   |

---

It is advisable to attempt to resolve as many as possible of the alerts in all categories. Often the minor alerts point to easily fixed oversights, errors and omissions in your CIF or refinement strategy, so attention to these fine details can be worthwhile. In order to resolve some of the more serious problems it may be necessary to carry out additional measurements or structure refinements. However, the purpose of your study may justify the reported deviations and the more serious of these should normally be commented upon in the discussion or experimental section of a paper or in the "special\_details" fields of the CIF. checkCIF was carefully designed to identify outliers and unusual parameters, but every test has its limitations and alerts that are not important in a particular case may appear. Conversely, the absence of alerts does not guarantee there are no aspects of the results needing attention. It is up to the individual to critically assess their own results and, if necessary, seek expert advice.

### **Publication of your CIF in IUCr journals**

A basic structural check has been run on your CIF. These basic checks will be run on all CIFs submitted for publication in IUCr journals (*Acta Crystallographica*, *Journal of Applied Crystallography*, *Journal of Synchrotron Radiation*); however, if you intend to submit to *Acta Crystallographica Section C* or *E* or *IUCrData*, you should make sure that full publication checks are run on the final version of your CIF prior to submission.

### **Publication of your CIF in other journals**

Please refer to the *Notes for Authors* of the relevant journal for any special instructions relating to CIF submission.



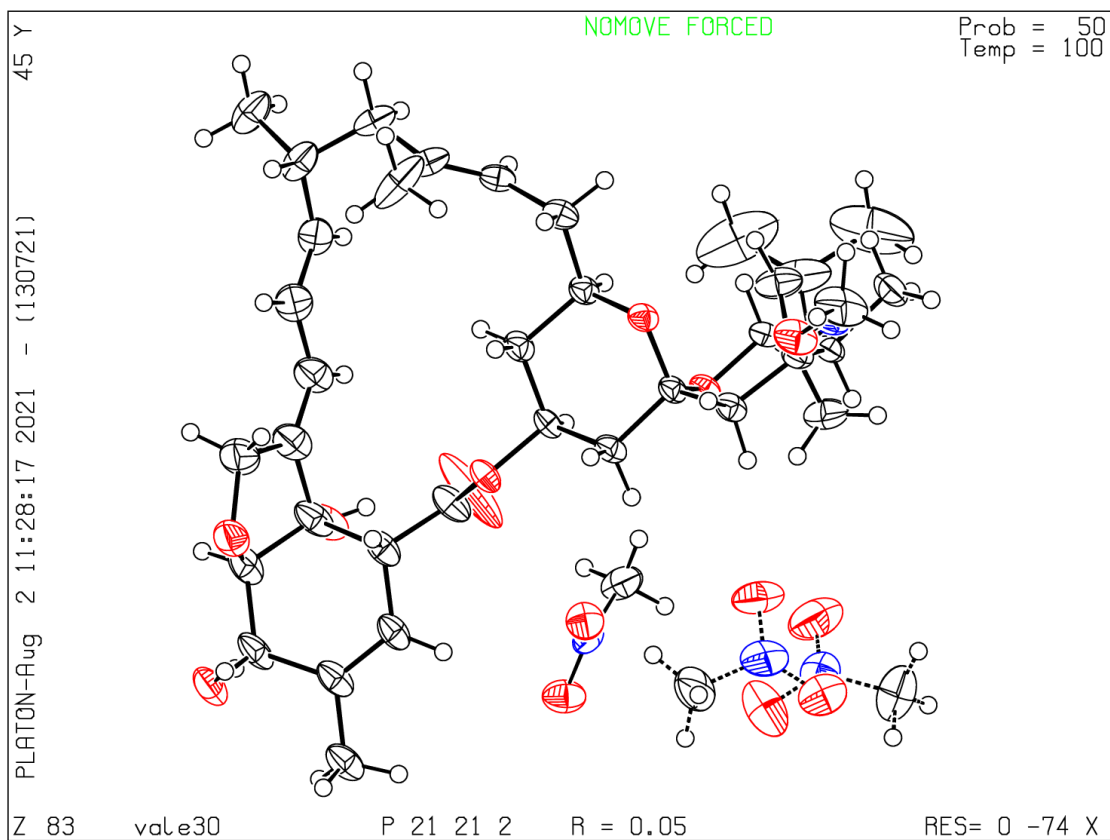

Supplement: s1 [file s1]
