# Supplementary material for: Solvatomorphism of Moxidectin
Source: MDPI journal article supplement (doi:10.3390/molecules26164869), 2021-08-11

# checkCIF/PLATON report

Structure factors have been supplied for datablock(s) vale25

THIS REPORT IS FOR GUIDANCE ONLY. IF USED AS PART OF A REVIEW PROCEDURE FOR PUBLICATION, IT SHOULD NOT REPLACE THE EXPERTISE OF AN EXPERIENCED CRYSTALLOGRAPHIC REFEREE.

No syntax errors found.      CIF dictionary      Interpreting this report

## Datablock: vale25

---

|                                                               |                          |                                  |
|---------------------------------------------------------------|--------------------------|----------------------------------|
| Bond precision:                                               | C-C = 0.0035 A           | Wavelength=0.71073               |
| Cell:                                                         | a=11.5186(5)             | b=9.1524(4)      c=21.8079(9)    |
|                                                               | alpha=90                 | beta=93.005(4)      gamma=90     |
| Temperature:                                                  | 293 K                    |                                  |
|                                                               | Calculated               | Reported                         |
| Volume                                                        | 2295.89(17)              | 2295.89(17)                      |
| Space group                                                   | P 21                     | P 21                             |
| Hall group                                                    | P 2yb                    | P 2yb                            |
| Moiety formula                                                | C37 H53 N O8 [+ solvent] | C37 H53 N1 O8                    |
| Sum formula                                                   | C37 H53 N O8 [+ solvent] | C37 H53 N O8                     |
| Mr                                                            | 639.80                   | 639.80                           |
| Dx,g cm-3                                                     | 0.925                    | 0.925                            |
| Z                                                             | 2                        | 2                                |
| Mu (mm-1)                                                     | 0.064                    | 0.064                            |
| F000                                                          | 692.0                    | 692.0                            |
| F000'                                                         | 692.34                   |                                  |
| h,k,lmax                                                      | 15,12,29                 | 15,12,29                         |
| Nref                                                          | 11400[ 6051]             | 11396                            |
| Tmin,Tmax                                                     | 0.992,0.994              | 0.887,1.000                      |
| Tmin'                                                         | 0.990                    |                                  |
| Correction method= # Reported T Limits: Tmin=0.887 Tmax=1.000 |                          |                                  |
| AbsCorr = MULTI-SCAN                                          |                          |                                  |
| Data completeness=                                            | 1.88/1.00                | Theta(max)= 28.282               |
| R(reflections)=                                               | 0.0413( 8779)            | wR2(reflections)= 0.1133( 11396) |
| S =                                                           | 1.052                    | Npar= 426                        |

---

The following ALERTS were generated. Each ALERT has the format

**test-name\_ALERT\_alert-type\_alert-level.**

Click on the hyperlinks for more details of the test.

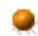

#### Alert level B

PLAT420\_ALERT\_2\_B D-H Bond Without Acceptor O2 --H52 . Please Check

**Author Response: Caused by applying SQUEEZE. There is a hydrogen bond the solvent mol- ecule. For further details see the low-temperature measurement or the article.**

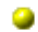

#### Alert level C

PLAT242\_ALERT\_2\_C Low 'MainMol' Ueq as Compared to Neighbors of C14 Check  
PLAT242\_ALERT\_2\_C Low 'MainMol' Ueq as Compared to Neighbors of C28 Check  
PLAT934\_ALERT\_3\_C Number of (Iobs-Icalc)/Sigma(W) > 10 Outliers .. 1 Check

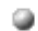

#### Alert level G

PLAT007\_ALERT\_5\_G Number of Unrefined Donor-H Atoms ..... 2 Report  
PLAT199\_ALERT\_1\_G Reported \_cell\_measurement\_temperature ..... (K) 293 Check  
PLAT200\_ALERT\_1\_G Reported \_diffrn\_ambient\_temperature ..... (K) 293 Check  
PLAT395\_ALERT\_2\_G Deviating X-O-Y Angle From 120 for O8 108.4 Degree  
PLAT398\_ALERT\_2\_G Deviating C-O-C Angle From 120 for O3 106.5 Degree  
PLAT606\_ALERT\_4\_G Solvent Accessible VOID(S) in Structure ..... ! Info

**Author Response: SQUEEZE was applied. See response above.**

PLAT791\_ALERT\_4\_G Model has Chirality at C2 (Sohnke SpGr) R Verify

**Author Response: The absolute structure of the molecule is known and was not deter- mined by anomalous-dispersion effects. The sample was a weak anomalous scatterer. The absolute structure parameter was calculated to be 0.2(3) which is meaningless for the determination of the absolute structure. It was thus deleted from the \*.cif file.**

PLAT791\_ALERT\_4\_G Model has Chirality at C5 (Sohnke SpGr) R Verify

**Author Response: The absolute structure of the molecule is known and was not deter- mined by anomalous-dispersion effects. The sample was a weak anomalous scatterer. The absolute structure parameter was calculated to be 0.2(3) which is meaningless for the determination of the absolute structure. It was thus deleted from the \*.cif file.**

PLAT791\_ALERT\_4\_G Model has Chirality at C6 (Sohnke SpGr) R Verify

**Author Response:** The absolute structure of the molecule is known and was not determined by anomalous-dispersion effects. The sample was a weak anomalous scatterer. The absolute structure parameter was calculated to be 0.2(3) which is meaningless for the determination of the absolute structure. It was thus deleted from the \*.cif file.

PLAT791\_ALERT\_4\_G Model has Chirality at C7 (Sohnke SpGr) S Verify

**Author Response:** The absolute structure of the molecule is known and was not determined by anomalous-dispersion effects. The sample was a weak anomalous scatterer. The absolute structure parameter was calculated to be 0.2(3) which is meaningless for the determination of the absolute structure. It was thus deleted from the \*.cif file.

PLAT791\_ALERT\_4\_G Model has Chirality at C12 (Sohnke SpGr) R Verify

**Author Response:** The absolute structure of the molecule is known and was not determined by anomalous-dispersion effects. The sample was a weak anomalous scatterer. The absolute structure parameter was calculated to be 0.2(3) which is meaningless for the determination of the absolute structure. It was thus deleted from the \*.cif file.

PLAT791\_ALERT\_4\_G Model has Chirality at C17 (Sohnke SpGr) R Verify

**Author Response:** The absolute structure of the molecule is known and was not determined by anomalous-dispersion effects. The sample was a weak anomalous scatterer. The absolute structure parameter was calculated to be 0.2(3) which is meaningless for the determination of the absolute structure. It was thus deleted from the \*.cif file.

PLAT791\_ALERT\_4\_G Model has Chirality at C19 (Sohnke SpGr) S Verify

**Author Response:** The absolute structure of the molecule is known and was not determined by anomalous-dispersion effects. The sample was a weak anomalous scatterer. The absolute structure parameter was calculated to be 0.2(3) which is meaningless for the determination of the absolute structure. It was thus deleted from the \*.cif file.

PLAT791\_ALERT\_4\_G Model has Chirality at C21 (Sohnke SpGr) R Verify

**Author Response:** The absolute structure of the molecule is known and was not determined by anomalous-dispersion effects. The sample was a weak anomalous scatterer. The absolute structure parameter was calculated to be 0.2(3) which is meaningless for the determination of the absolute structure. It was thus deleted from the \*.cif file.

**Author Response:** The absolute structure of the molecule is known and was not determined by anomalous-dispersion effects. The sample was a weak anomalous scatterer. The absolute structure parameter was calculated to be 0.2(3) which is meaningless for the determination of the absolute structure. It was thus deleted from the \*.cif file.

**Author Response:** The absolute structure of the molecule is known and was not determined by anomalous-dispersion effects. The sample was a weak anomalous scatterer. The absolute structure parameter was calculated to be 0.2(3) which is meaningless for the determination of the absolute structure. It was thus deleted from the \*.cif file.

**Author Response:** The same crystal structure has been determined at lower temperature where the atomic sites could be determined reliably. This crystal structure was measured at room temperature, where all attempts to reasonably refine solvent molecules failed. Therefore, the SQUEEZE routine implemented in PLATON was applied and a squeezed electron count of 187 electrons per unit cell is obtained:

===== N: Total  
Potential Solvent Accessible Void Vol (SOLV-Map Value) ... 659 Ang<sup>3</sup> N: Electron  
Count Voids / Cell = 129 This is in accordance with two loosely packed iso-propanol  
molecules per asymmetric unit.

- 
- 0 **ALERT level A** = Most likely a serious problem - resolve or explain  
 1 **ALERT level B** = A potentially serious problem, consider carefully  
 3 **ALERT level C** = Check. Ensure it is not caused by an omission or oversight  
 20 **ALERT level G** = General information/check it is not something unexpected
- 2 ALERT type 1 CIF construction/syntax error, inconsistent or missing data  
 6 ALERT type 2 Indicator that the structure model may be wrong or deficient  
 2 ALERT type 3 Indicator that the structure quality may be low  
 12 ALERT type 4 Improvement, methodology, query or suggestion  
 2 ALERT type 5 Informative message, check
-

It is advisable to attempt to resolve as many as possible of the alerts in all categories. Often the minor alerts point to easily fixed oversights, errors and omissions in your CIF or refinement strategy, so attention to these fine details can be worthwhile. In order to resolve some of the more serious problems it may be necessary to carry out additional measurements or structure refinements. However, the purpose of your study may justify the reported deviations and the more serious of these should normally be commented upon in the discussion or experimental section of a paper or in the "special\_details" fields of the CIF. checkCIF was carefully designed to identify outliers and unusual parameters, but every test has its limitations and alerts that are not important in a particular case may appear. Conversely, the absence of alerts does not guarantee there are no aspects of the results needing attention. It is up to the individual to critically assess their own results and, if necessary, seek expert advice.

### **Publication of your CIF in IUCr journals**

A basic structural check has been run on your CIF. These basic checks will be run on all CIFs submitted for publication in IUCr journals (*Acta Crystallographica*, *Journal of Applied Crystallography*, *Journal of Synchrotron Radiation*); however, if you intend to submit to *Acta Crystallographica Section C* or *E* or *IUCrData*, you should make sure that full publication checks are run on the final version of your CIF prior to submission.

### **Publication of your CIF in other journals**

Please refer to the *Notes for Authors* of the relevant journal for any special instructions relating to CIF submission.

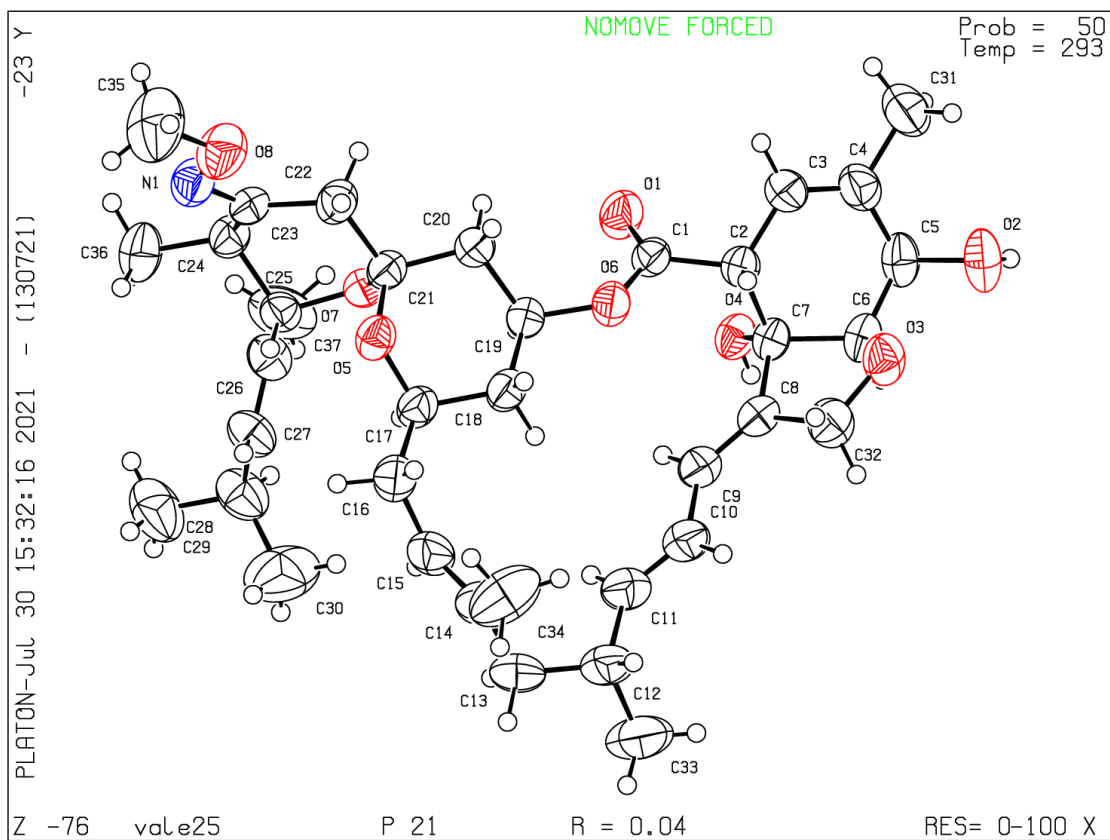

Supplement: s1 [file s1]
